# Supplementary material for: Response and Potential Indication to Hypoxia in the Changjiang River Estuary and its Adjacent Waters: Insight From Redox-Sensitive Trace Elements in Sediment Core
Source: Frontiers journal article supplement (doi:10.3389/feart.2022.861977), 2022-04-25
Supplement: Data_Sheet_1.xlsx [file Data_Sheet_1.xlsx]

## Sheet: TableS1
	Our study	Wu et al., 2020
Core	3050-2	E3	E4
Location	30.49°N, 123.02°E	30.93°N, 122.76°E	30.93°N, 123.01°E
Core legenth	30 cm	132 cm	50 cm
Tempreture in bottm water	18.61℃
Sality in bottm water	34.49
Water depth	61 m	23.0 m	40.0 m
DO in bottom water	1.76 mg/L
MoEF/UEF in Surface sediment	1.103
Average deposition rate	1.96 cm/y	5.18 cm/y	1.93 cm/y
Mass accumulation rates (MAR)		5.87 g/cm-2/y-1	3.11 g/cm-2/y-1

## Sheet: TableS2
Sediment core E4 (Wu et al., 2020)																		Sediment core 3050-2
Depth/cm	Year																	Depth/cm	Year
0.5	2012.04																	0.5	2020
1.5	2011.63																	1.5	2019.49
2.5	2011.22																	2.5	2018.98
3.5	2010.62																	3.5	2018.47
4.5	2010.01																	4.5	2017.96
5.5	2009.4																	5.5	2017.45
6.5	2008.8																	6.5	2016.94
7.5	2008.4																	7.5	2016.43
8.5	2007.99																	8.5	2015.92
9.5	2007.59																	9.5	2015.41
10.5	2007.19																	11	2014.65
11.5	2006.66																	15	2012.61
12.5	2006.12																	19	2010.57
13.5	2005.59																	25	2007.51
14.5	2005.06																	29	2005.47
15.5	2004.6
16.5	2004.15
17.5	2003.69
18.5	2003.24
19.5	2002.78
20.5	2002.33
21.5	2001.87
22.5	2001.27
23.5	2000.68
24.5	2000.08
25.5	1999.48
26.5	1998.92
27.5	1998.37
28.5	1997.81
29.5	1997.26
30.5	1996.7
31.5	1996.3
32.5	1995.89
33.5	1995.48
34.5	1995.07
35.5	1994.63
36.5	1994.19
37.5	1993.74
38.5	1993.3
39.5	1992.72
40.5	1992.14
41.5	1991.56
42.5	1990.98
43.5	1990.32
44.5	1989.66
45.5	1989.01
46.5	1988.35
47.5	1987.79
48.5	1987.23
49.5	1986.67

## Sheet: TableS3
Sediment core 3050-2
Depth/cm	Year	Clay proportion/%	median diameter/μm	TOC/%	TN/%	C/N	δ13C/‰	δ15N/‰	OCmarine/%	Fe/Al	Mn/Al/10-4	V/Al/10-4	Mo/Al/10-4	U/Al/10-4	MoEF/UEF
0.5	2020	15.79	28.1714	0.377	0.054	6.936	-20.949	3.45	84.19	0.501	78.466	11.337	0.047	0.297	1.103
1.5	2019.49	19.72	13.7568	0.359	0.053	6.729	-21.049	3.731	82.524	0.51	78.698	12.24	0.056	0.313	1.245
2.5	2018.98	25.31	9.41998	0.378	0.054	6.982	-21.399	3.781	76.68	0.503	76.361	11.94	0.052	0.291	1.242
3.5	2018.47	21.51	11.8254	0.336	0.048	7.004	-21.469	3.356	75.514	0.5	76.684	11.801	0.052	0.343	1.06
4.5	2017.96	19.21	13.9574	0.369	0.052	7.102	-21.27	3.68	78.828	0.492	73.114	11.72	0.049	0.295	1.161
5.5	2017.45	18.93	14.8445	0.325	0.047	6.945	-21.344	3.266	77.596	0.49	72.634	11.338	0.051	0.313	1.127
6.5	2016.94	16.21	19.0642	0.285	0.045	6.389	-20.971	4.445	83.819	0.485	71.003	10.768	0.048	0.311	1.086
7.5	2016.43	15.08	26.7756	0.214	0.032	6.693	-21.438	3.129	76.03	0.483	70.642	10.394	0.043	0.285	1.06
8.5	2015.92	19.6	16.0973	0.259	0.036	7.274	-21.019	3.569	83.024	0.478	69.57	10.672	0.045	0.277	1.136
9.5	2015.41	22.48	12.1686	0.323	0.047	6.85	-20.649	4.358	89.177	0.485	69.874	11.203	0.046	0.337	0.944
11	2014.65	22.45	12.1828	0.353	0.049	7.192	-21.034	3.825	82.767	0.5	71.453	11.218	0.063	0.349	1.252
15	2012.61	18.53	18.7731	0.374	0.052	7.225	-20.557	4.043	90.713	0.508	72.496	11.687	0.055	0.357	1.065
19	2010.57	21.54	13.5987	0.301	0.039	7.75	-21.023	5.076	82.949	0.503	70.221	12.008	0.054	0.358	1.053
25	2007.51	16.48	38.7249	0.26	0.035	7.386	-21.178	4.758	80.361	0.494	69.164	10.797	0.038	0.327	0.8
29	2005.47	12.17	77.8811	0.251	0.031	8.102	-21.222	4.605	79.627	0.484	69.39	11.393	0.047	0.515	0.643

## Sheet: TableS4
Pearson Correlation Analysis					Pearson Correlation Analysis
r	V/Al	Mo/Al	U/Al		r	V	Mo	U
Clay proportion	0.472	0.521*	-0.377		Al	0.811**	0.532*	0.431
TOC	0.717**	0.625*	-0.204		* p<0.05, ** p<0.01
Fe/Al	0.779**	0.628*	-0.038
Mn/Al	0.603*	0.367	-0.31
* p<0.05, ** p<0.01
Linear Correlation Analysis					Linear Correlation Analysis
R2	V/Al	Mo/Al	U/Al		R2	V	Mo	U
Clay proportion	0.223275	0.252331	0.141114		Al	0.658053	0.284838	0.186291
TOC	0.513724	0.365014	0.0413648
Fe/Al	0.605748	0.377429	0.000862414
Mn/Al	0.363515	0.133715	0.0962932

## Sheet: TableS5
	MoEF/UEF
Year	3050-2	E3	E4
2020	1.103
2019	1.245
2018	1.151
2017	1.144
2016	1.073
2015	1.04
2014	1.252
2013
2012	1.065		1.296
2011		1.417	1.584
2010	1.053	1.264	1.409
2009		1.382	1.037
2008		1.25	1.007
2007	0.8	1.284	0.851
2006		1.004	0.958
2005	0.643	1.688	0.8
AVE	1.05173	1.327	1.11775
MAX	1.252	1.688	1.584
MIN	0.643	1.004	0.8

## Sheet: E3
Sediment core E3 (Wu et al., 2020)
Year	Mo/Al/10-4	U/Al/10-4	MoEF/UEF
2011.56	0.173994	0.450023	1.46625
2011.12	0.12243	0.339464	1.36773
2010.91	0.11724	0.368542	1.20642
2010.7	0.130154	0.43103	1.14514
2010.28	0.129091	0.354302	1.38176
2010.07	0.124653	0.357397	1.3227
2009.86	0.138251	0.346447	1.51335
2009.57	0.147939	0.349673	1.60446
2009.48	0.11178	0.323231	1.31147
2009.39	0.105785	0.3278	1.22384
2009.13	0.108163	0.326325	1.257
2008.96	0.12864	0.318733	1.53058
2008.79	0.128864	0.383989	1.27269
2008.61	0.105567	0.340749	1.17491
2008.44	0.098495	0.371844	1.00453
2008.13	0.106757	0.325663	1.24319
2008	0.111203	0.331243	1.27315
2007.87	0.129557	0.371377	1.32299
2007.74	0.13134	0.363025	1.37205
2007.61	0.0975854	0.352552	1.04971
2007.09	0.111215	0.303314	1.39053
2006.9	0.0914637	0.378268	0.916975
2006.71	0.0936644	0.314683	1.12878
2006.52	0.104424	0.386671	1.02416
2006.17	0.0739965	0.296178	0.947474
2005.7	0.165507	0.362945	1.72936
2005.16	0.146177	0.336855	1.64567

## Sheet: E4
Sediment core E4 (Wu et al., 2020)
Year	Mo/Al/10-4	U/Al/10-4	MoEF/UEF
2012.04	0.0780632	0.419807	1.29634
2011.63	0.0702223	0.33968	1.44121
2011.22	0.0908809	0.366769	1.72743
2010.62	0.0603005	0.333328	1.26116
2010.01	0.0963393	0.431233	1.55745
2009.4	0.0673087	0.452377	1.03727
2008.8	0.0652672	0.415888	1.09406
2008.4	0.0623136	0.471803	0.920755
2007.99	0.0439168	0.475765	0.643516
2007.59	0.0671067	0.450782	1.03782
2007.19	0.0513061	0.410448	0.871429
2006.66	0.0592029	0.430304	0.959156
2006.12	0.0596295	0.434668	0.956369
2005.59	0.0448938	0.405447	0.771923
2005.06	0.051024	0.429202	0.828771
